# Supplementary material for: The Thiol Group Reactivity and the Antioxidant Property of Human Serum Albumin Are Controlled by the Joint Action of Fatty Acids and Glucose Binding
Source: Int J Mol Sci. 2024 Feb 16;25(4):2335. doi: 10.3390/ijms25042335 (PMC10889162; doi:10.3390/ijms25042335)
Supplement: Supplementary file 1 [file ijms-25-02335-s001.zip › Supplementary tables S1-S8 (ANOVA for figures 5-8).xlsx]

## Sheet: ANOVA for figure 5
content
Supplementary Table S1. ANOVA
HSA:SA ratio
A) HSA:SA 1:0		B) HSA:SA 1:1		C) HSA:SA 1:2		D) HSA:SA 1:4
ANOVAa	Sig.	ANOVAa	Sig.	ANOVAa	Sig.	ANOVAa	Sig.
0h	0.76544	0h	0.273126	0h	0.956044	0h	0.716662
1h	0.00205473	1h	0.430526	1h	0.911469	1h	0.812962
2h	0.00643727	2h	0.00180406	2h	0.397775	2h	0.741578
3h	0.000718712	3h	0.0109549	3h	0.154119	3h	0.0480146
4h	5.48158e-08	4h	0.180372	4h	0.566053	4h	0.211705
6h	0.689791	6h	0.00223218	6h	6.66096e-07	6h	0.67129
7h	1.23849e-06	7h	0.000182582	7h	6.69317e-06	7h	0.546638
10h	2.51908e-09	10h	0.00163872	10h	0.000684107	10h	0.00550294
14h	3.79208e-09	14h	3.82332e-05	14h	2.84938e-05	14h	0.228574
A) HSA:SA 1:0							B) HSA:SA 1:1							C) HSA:SA 1:2							D) HSA:SA 1:4
Supplementary Table S2. Post-hoc mutiple comparisons
glucose concentrations
Multiple Comparisonsa				Multiple Comparisonsa				Multiple Comparisonsa				Multiple Comparisonsa
Games-Howell				Games-Howell				Games-Howell				Games-Howell
A) HSA:SA 1:0			Sig.	B) HSA:SA 1:1			Sig.	C) HSA:SA 1:2			Sig.	D) HSA:SA 1:4			Sig.
	glucose concentrations				glucose concentrations				glucose concentrations				glucose concentrations
0h	0 mM Glc	5 mM Glc	0.784882	0h	0 mM Glc	5 mM Glc	0.715552	0h	0 mM Glc	5 mM Glc	0.98712	0h	0 mM Glc	5 mM Glc	0.859342
		10 mM Glc	0.783501			10 mM Glc	0.99081			10 mM Glc	0.99941			10 mM Glc	0.952464
		20 mM Glc	0.713745			20 mM Glc	0.0126355			20 mM Glc	1			20 mM Glc	0.999796
	5 mM Glc	0 mM Glc	0.784882		5 mM Glc	0 mM Glc	0.715552		5 mM Glc	0 mM Glc	0.98712		5 mM Glc	0 mM Glc	0.859342
		10 mM Glc	0.998463			10 mM Glc	0.763092			10 mM Glc	0.879494			10 mM Glc	0.957566
		20 mM Glc	0.988651			20 mM Glc	0.999881			20 mM Glc	0.944703			20 mM Glc	0.829254
	10 mM Glc	0 mM Glc	0.783501		10 mM Glc	0 mM Glc	0.99081		10 mM Glc	0 mM Glc	0.99941		10 mM Glc	0 mM Glc	0.952464
		5 mM Glc	0.998463			5 mM Glc	0.763092			5 mM Glc	0.879494			5 mM Glc	0.957566
		20 mM Glc	0.998829			20 mM Glc	0.0274921			20 mM Glc	0.997263			20 mM Glc	0.911091
	20 mM Glc	0 mM Glc	0.713745		20 mM Glc	0 mM Glc	0.0126355		20 mM Glc	0 mM Glc	1		20 mM Glc	0 mM Glc	0.999796
		5 mM Glc	0.988651			5 mM Glc	0.999881			5 mM Glc	0.944703			5 mM Glc	0.829254
		10 mM Glc	0.998829			10 mM Glc	0.0274921			10 mM Glc	0.997263			10 mM Glc	0.911091
1h	0 mM Glc	5 mM Glc	0.0230738	1h	0 mM Glc	5 mM Glc	0.851284	1h	0 mM Glc	5 mM Glc	0.975211	1h	0 mM Glc	5 mM Glc	0.677776
		10 mM Glc	0.0250039			10 mM Glc	0.958856			10 mM Glc	0.999999			10 mM Glc	0.973444
		20 mM Glc	0.175446			20 mM Glc	0.862342			20 mM Glc	0.975798			20 mM Glc	0.834963
	5 mM Glc	0 mM Glc	0.0230738		5 mM Glc	0 mM Glc	0.851284		5 mM Glc	0 mM Glc	0.975211		5 mM Glc	0 mM Glc	0.677776
		10 mM Glc	0.996888			10 mM Glc	0.626935			10 mM Glc	0.930503			10 mM Glc	0.93355
		20 mM Glc	0.268132			20 mM Glc	0.521906			20 mM Glc	0.999999			20 mM Glc	0.995402
	10 mM Glc	0 mM Glc	0.0250039		10 mM Glc	0 mM Glc	0.958856		10 mM Glc	0 mM Glc	0.999999		10 mM Glc	0 mM Glc	0.973444
		5 mM Glc	0.996888			5 mM Glc	0.626935			5 mM Glc	0.930503			5 mM Glc	0.93355
		20 mM Glc	0.291339			20 mM Glc	0.981526			20 mM Glc	0.929467			20 mM Glc	0.984398
	20 mM Glc	0 mM Glc	0.175446		20 mM Glc	0 mM Glc	0.862342		20 mM Glc	0 mM Glc	0.975798		20 mM Glc	0 mM Glc	0.834963
		5 mM Glc	0.268132			5 mM Glc	0.521906			5 mM Glc	0.999999			5 mM Glc	0.995402
		10 mM Glc	0.291339			10 mM Glc	0.981526			10 mM Glc	0.929467			10 mM Glc	0.984398
2h	0 mM Glc	5 mM Glc	0.369412	2h	0 mM Glc	5 mM Glc	0.0863983	2h	0 mM Glc	5 mM Glc	0.993596	2h	0 mM Glc	5 mM Glc	0.998401
		10 mM Glc	0.656709			10 mM Glc	0.822251			10 mM Glc	0.946304			10 mM Glc	0.999304
		20 mM Glc	0.251413			20 mM Glc	0.23948			20 mM Glc	0.752571			20 mM Glc	0.813286
	5 mM Glc	0 mM Glc	0.369412		5 mM Glc	0 mM Glc	0.0863983		5 mM Glc	0 mM Glc	0.993596		5 mM Glc	0 mM Glc	0.998401
		10 mM Glc	0.989872			10 mM Glc	0.0108495			10 mM Glc	0.969282			10 mM Glc	1
		20 mM Glc	0.00687738			20 mM Glc	0.553706			20 mM Glc	0.202228			20 mM Glc	0.829078
	10 mM Glc	0 mM Glc	0.656709		10 mM Glc	0 mM Glc	0.822251		10 mM Glc	0 mM Glc	0.946304		10 mM Glc	0 mM Glc	0.999304
		5 mM Glc	0.989872			5 mM Glc	0.0108495			5 mM Glc	0.969282			5 mM Glc	1
		20 mM Glc	0.0493911			20 mM Glc	0.0227881			20 mM Glc	0.388698			20 mM Glc	0.883532
	20 mM Glc	0 mM Glc	0.251413		20 mM Glc	0 mM Glc	0.23948		20 mM Glc	0 mM Glc	0.752571		20 mM Glc	0 mM Glc	0.813286
		5 mM Glc	0.00687738			5 mM Glc	0.553706			5 mM Glc	0.202228			5 mM Glc	0.829078
		10 mM Glc	0.0493911			10 mM Glc	0.0227881			10 mM Glc	0.388698			10 mM Glc	0.883532
3h	0 mM Glc	5 mM Glc	0.0141581	3h	0 mM Glc	5 mM Glc	0.0392802	3h	0 mM Glc	5 mM Glc	0.252847	3h	0 mM Glc	5 mM Glc	0.357868
		10 mM Glc	0.00794687			10 mM Glc	0.916047			10 mM Glc	0.506178			10 mM Glc	0.136974
		20 mM Glc	0.816817			20 mM Glc	0.999818			20 mM Glc	0.138119			20 mM Glc	0.978803
	5 mM Glc	0 mM Glc	0.0141581		5 mM Glc	0 mM Glc	0.0392802		5 mM Glc	0 mM Glc	0.252847		5 mM Glc	0 mM Glc	0.357868
		10 mM Glc	0.991539			10 mM Glc	0.00810518			10 mM Glc	0.998636			10 mM Glc	0.888321
		20 mM Glc	0.0593013			20 mM Glc	0.0112894			20 mM Glc	0.963189			20 mM Glc	0.371167
	10 mM Glc	0 mM Glc	0.00794687		10 mM Glc	0 mM Glc	0.916047		10 mM Glc	0 mM Glc	0.506178		10 mM Glc	0 mM Glc	0.136974
		5 mM Glc	0.991539			5 mM Glc	0.00810518			5 mM Glc	0.998636			5 mM Glc	0.888321
		20 mM Glc	0.0570218			20 mM Glc	0.837398			20 mM Glc	0.94727			20 mM Glc	0.150154
	20 mM Glc	0 mM Glc	0.816817		20 mM Glc	0 mM Glc	0.999818		20 mM Glc	0 mM Glc	0.138119		20 mM Glc	0 mM Glc	0.978803
		5 mM Glc	0.0593013			5 mM Glc	0.0112894			5 mM Glc	0.963189			5 mM Glc	0.371167
		10 mM Glc	0.0570218			10 mM Glc	0.837398			10 mM Glc	0.94727			10 mM Glc	0.150154
4h	0 mM Glc	5 mM Glc	3.27337e-05	4h	0 mM Glc	5 mM Glc	0.188234	4h	0 mM Glc	5 mM Glc	0.513295	4h	0 mM Glc	5 mM Glc	0.789263
		10 mM Glc	0.00021002			10 mM Glc	0.995156			10 mM Glc	0.895199			10 mM Glc	0.829467
		20 mM Glc	0.000279113			20 mM Glc	0.987684			20 mM Glc	0.967816			20 mM Glc	0.340481
	5 mM Glc	0 mM Glc	3.27337e-05		5 mM Glc	0 mM Glc	0.188234		5 mM Glc	0 mM Glc	0.513295		5 mM Glc	0 mM Glc	0.789263
		10 mM Glc	0.297318			10 mM Glc	0.288454			10 mM Glc	0.938156			10 mM Glc	0.617768
		20 mM Glc	0.124123			20 mM Glc	0.23788			20 mM Glc	0.666006			20 mM Glc	0.588007
	10 mM Glc	0 mM Glc	0.00021002		10 mM Glc	0 mM Glc	0.995156		10 mM Glc	0 mM Glc	0.895199		10 mM Glc	0 mM Glc	0.829467
		5 mM Glc	0.297318			5 mM Glc	0.288454			5 mM Glc	0.938156			5 mM Glc	0.617768
		20 mM Glc	0.0358067			20 mM Glc	0.953011			20 mM Glc	0.983335			20 mM Glc	0.247401
	20 mM Glc	0 mM Glc	0.000279113		20 mM Glc	0 mM Glc	0.987684		20 mM Glc	0 mM Glc	0.967816		20 mM Glc	0 mM Glc	0.340481
		5 mM Glc	0.124123			5 mM Glc	0.23788			5 mM Glc	0.666006			5 mM Glc	0.588007
		10 mM Glc	0.0358067			10 mM Glc	0.953011			10 mM Glc	0.983335			10 mM Glc	0.247401
6h	0 mM Glc	5 mM Glc	0.999746	6h	0 mM Glc	5 mM Glc	0.0202964	6h	0 mM Glc	5 mM Glc	0.00768874	6h	0 mM Glc	5 mM Glc	0.157861
		10 mM Glc	0.822234			10 mM Glc	0.995156			10 mM Glc	0.000116316			10 mM Glc	0.635992
		20 mM Glc	0.99038			20 mM Glc	0.151153			20 mM Glc	0.00157343			20 mM Glc	0.85137
	5 mM Glc	0 mM Glc	0.999746		5 mM Glc	0 mM Glc	0.0202964		5 mM Glc	0 mM Glc	0.00768874		5 mM Glc	0 mM Glc	0.157861
		10 mM Glc	0.0107852			10 mM Glc	0.0251986			10 mM Glc	0.00917691			10 mM Glc	0.984388
		20 mM Glc	0.93387			20 mM Glc	0.703099			20 mM Glc	0.0177034			20 mM Glc	0.860584
	10 mM Glc	0 mM Glc	0.822234		10 mM Glc	0 mM Glc	0.995156		10 mM Glc	0 mM Glc	0.000116316		10 mM Glc	0 mM Glc	0.635992
		5 mM Glc	0.0107852			5 mM Glc	0.0251986			5 mM Glc	0.00917691			5 mM Glc	0.984388
		20 mM Glc	0.504794			20 mM Glc	0.18737			20 mM Glc	0.464211			20 mM Glc	0.984861
	20 mM Glc	0 mM Glc	0.99038		20 mM Glc	0 mM Glc	0.151153		20 mM Glc	0 mM Glc	0.00157343		20 mM Glc	0 mM Glc	0.85137
		5 mM Glc	0.93387			5 mM Glc	0.703099			5 mM Glc	0.0177034			5 mM Glc	0.860584
		10 mM Glc	0.504794			10 mM Glc	0.18737			10 mM Glc	0.464211			10 mM Glc	0.984861
7h	0 mM Glc	5 mM Glc	0.000467292	7h	0 mM Glc	5 mM Glc	0.000462706	7h	0 mM Glc	5 mM Glc	0.0148768	7h	0 mM Glc	5 mM Glc	0.92905
		10 mM Glc	0.0037761			10 mM Glc	0.762518			10 mM Glc	0.000185127			10 mM Glc	0.673921
		20 mM Glc	1.11365e-06			20 mM Glc	0.0696473			20 mM Glc	0.0152726			20 mM Glc	0.996638
	5 mM Glc	0 mM Glc	0.000467292		5 mM Glc	0 mM Glc	0.000462706		5 mM Glc	0 mM Glc	0.0148768		5 mM Glc	0 mM Glc	0.92905
		10 mM Glc	0.864929			10 mM Glc	0.0610494			10 mM Glc	0.0223408			10 mM Glc	0.394125
		20 mM Glc	0.871219			20 mM Glc	3.6961e-05			20 mM Glc	0.999902			20 mM Glc	0.919713
	10 mM Glc	0 mM Glc	0.0037761		10 mM Glc	0 mM Glc	0.762518		10 mM Glc	0 mM Glc	0.000185127		10 mM Glc	0 mM Glc	0.673921
		5 mM Glc	0.864929			5 mM Glc	0.0610494			5 mM Glc	0.0223408			5 mM Glc	0.394125
		20 mM Glc	0.989303			20 mM Glc	0.914252			20 mM Glc	0.0175786			20 mM Glc	0.901584
	20 mM Glc	0 mM Glc	1.11365e-06		20 mM Glc	0 mM Glc	0.0696473		20 mM Glc	0 mM Glc	0.0152726		20 mM Glc	0 mM Glc	0.996638
		5 mM Glc	0.871219			5 mM Glc	3.6961e-05			5 mM Glc	0.999902			5 mM Glc	0.919713
		10 mM Glc	0.989303			10 mM Glc	0.914252			10 mM Glc	0.0175786			10 mM Glc	0.901584
10h	0 mM Glc	5 mM Glc	0.000147965	10h	0 mM Glc	5 mM Glc	0.000243948	10h	0 mM Glc	5 mM Glc	0.00285234	10h	0 mM Glc	5 mM Glc	0.89278
		10 mM Glc	7.06267e-05			10 mM Glc	0.0488371			10 mM Glc	0.0140113			10 mM Glc	0.0453476
		20 mM Glc	7.30101e-05			20 mM Glc	0.978828			20 mM Glc	0.0123175			20 mM Glc	0.0391399
	5 mM Glc	0 mM Glc	0.000147965		5 mM Glc	0 mM Glc	0.000243948		5 mM Glc	0 mM Glc	0.00285234		5 mM Glc	0 mM Glc	0.89278
		10 mM Glc	1			10 mM Glc	0.769032			10 mM Glc	0.989836			10 mM Glc	0.236667
		20 mM Glc	0.999939			20 mM Glc	0.0694934			20 mM Glc	0.824071			20 mM Glc	0.115487
	10 mM Glc	0 mM Glc	7.06267e-05		10 mM Glc	0 mM Glc	0.0488371		10 mM Glc	0 mM Glc	0.0140113		10 mM Glc	0 mM Glc	0.0453476
		5 mM Glc	1			5 mM Glc	0.769032			5 mM Glc	0.989836			5 mM Glc	0.236667
		20 mM Glc	0.999949			20 mM Glc	0.270263			20 mM Glc	0.961919			20 mM Glc	0.858261
	20 mM Glc	0 mM Glc	7.30101e-05		20 mM Glc	0 mM Glc	0.978828		20 mM Glc	0 mM Glc	0.0123175		20 mM Glc	0 mM Glc	0.0391399
		5 mM Glc	0.999939			5 mM Glc	0.0694934			5 mM Glc	0.824071			5 mM Glc	0.115487
		10 mM Glc	0.999949			10 mM Glc	0.270263			10 mM Glc	0.961919			10 mM Glc	0.858261
14h	0 mM Glc	5 mM Glc	2.59958e-05	14h	0 mM Glc	5 mM Glc	0.0484078	14h	0 mM Glc	5 mM Glc	0.0241859	14h	0 mM Glc	5 mM Glc	0.631093
		10 mM Glc	0.00867804			10 mM Glc	0.0344555			10 mM Glc	6.70644e-05			10 mM Glc	0.920845
		20 mM Glc	3.18963e-07			20 mM Glc	0.497168			20 mM Glc	0.00269228			20 mM Glc	0.598273
	5 mM Glc	0 mM Glc	2.59958e-05		5 mM Glc	0 mM Glc	0.0484078		5 mM Glc	0 mM Glc	0.0241859		5 mM Glc	0 mM Glc	0.631093
		10 mM Glc	0.105624			10 mM Glc	0.080438			10 mM Glc	0.868698			10 mM Glc	0.683809
		20 mM Glc	1.371e-05			20 mM Glc	0.0183487			20 mM Glc	0.614082			20 mM Glc	0.515471
	10 mM Glc	0 mM Glc	0.00867804		10 mM Glc	0 mM Glc	0.0344555		10 mM Glc	0 mM Glc	6.70644e-05		10 mM Glc	0 mM Glc	0.920845
		5 mM Glc	0.105624			5 mM Glc	0.080438			5 mM Glc	0.868698			5 mM Glc	0.683809
		20 mM Glc	0.567715			20 mM Glc	0.0196951			20 mM Glc	9.25064e-05			20 mM Glc	0.353361
	20 mM Glc	0 mM Glc	3.18963e-07		20 mM Glc	0 mM Glc	0.497168		20 mM Glc	0 mM Glc	0.00269228		20 mM Glc	0 mM Glc	0.598273
		5 mM Glc	1.371e-05			5 mM Glc	0.0183487			5 mM Glc	0.614082			5 mM Glc	0.515471
		10 mM Glc	0.567715			10 mM Glc	0.0196951			10 mM Glc	9.25064e-05			10 mM Glc	0.353361

## Sheet: ANOVA for figure 6
content
Supplementary Table S3. ANOVA
Glucose concentration
A) 5mM glucose		B) 10mM glucose		C) 20mM glucose
ANOVAa	Sig.	ANOVAa	Sig.	ANOVAa	Sig.
0h	4.87544e-06	0h	1.48777e-07	0h	0.00132268
1h	0.728879	1h	0.169978	1h	0.0134791
2h	0.0565012	2h	0.00154556	2h	0.00184457
3h	0.0119525	3h	0.00538577	3h	0.0739947
4h	0.0390098	4h	0.402197	4h	2.00726e-06
6h	0.000460116	6h	0.000413481	6h	0.00198828
7h	2.33555e-06	7h	6.33753e-10	7h	7.09153e-07
10h	6.78845e-13	10h	1.5106e-07	10h	4.73284e-09
14h	0.00029178	14h	0.000123938	14h	0.00243271
A) 5mM glucose							B) 10mM glucose							C) 20mM glucose
Supplementary Table S4. Post-hoc mutiple comparisons
molar ratios of HSA:SA
Multiple Comparisonsa				Multiple Comparisonsa				Multiple Comparisonsa
Tukey HSD				Tukey HSD				Tukey HSD
A) 5mM glucose			Sig.	B) 10mM glucose			Sig.	C) 20mM glucose			Sig.
	molar ratios of HSA:SA				molar ratios of HSA:SA				molar ratios of HSA:SA
0h	1;0	1;1	0.0990132	0h	1;0	1;1	0.752124	0h	1;0	1;1	0.312245
		1;2	2.02565e-05			1;2	0.806743			1;2	0.0207451
		1;4	1.48046e-05			1;4	7.2888e-07			1;4	0.000763706
	1;1	1;0	0.0990132		1;1	1;0	0.752124		1;1	1;0	0.312245
		1;2	0.013056			1;2	0.3114			1;2	0.761449
		1;4	0.00612046			1;4	1.02456e-06			1;4	0.121241
	1;2	1;0	2.02565e-05		1;2	1;0	0.806743		1;2	1;0	0.0207451
		1;1	0.013056			1;1	0.3114			1;1	0.761449
		1;4	0.919013			1;4	1.44379e-06			1;4	0.349301
	1;4	1;0	1.48046e-05		1;4	1;0	7.2888e-07		1;4	1;0	0.000763706
		1;1	0.00612046			1;1	1.02456e-06			1;1	0.121241
		1;2	0.919013			1;2	1.44379e-06			1;2	0.349301
1h	1;0	1;1	0.973528	1h	1;0	1;1	0.642555	1h	1;0	1;1	0.0153969
		1;2	0.675198			1;2	0.938823			1;2	0.955371
		1;4	0.944331			1;4	0.470529			1;4	0.582524
	1;1	1;0	0.973528		1;1	1;0	0.642555		1;1	1;0	0.0153969
		1;2	0.893174			1;2	0.352653			1;2	0.032635
		1;4	0.998779			1;4	0.999091			1;4	0.274518
	1;2	1;0	0.675198		1;2	1;0	0.938823		1;2	1;0	0.955371
		1;1	0.893174			1;1	0.352653			1;1	0.032635
		1;4	0.952004			1;4	0.206868			1;4	0.825467
	1;4	1;0	0.944331		1;4	1;0	0.470529		1;4	1;0	0.582524
		1;1	0.998779			1;1	0.999091			1;1	0.274518
		1;2	0.952004			1;2	0.206868			1;2	0.825467
2h	1;0	1;1	0.437048	2h	1;0	1;1	0.00710199	2h	1;0	1;1	0.771655
		1;2	0.056747			1;2	0.0465151			1;2	0.738889
		1;4	0.118972			1;4	0.00114469			1;4	0.00142205
	1;1	1;0	0.437048		1;1	1;0	0.00710199		1;1	1;0	0.771655
		1;2	0.651082			1;2	0.800659			1;2	0.999957
		1;4	0.886539			1;4	0.520912			1;4	0.0248101
	1;2	1;0	0.056747		1;2	1;0	0.0465151		1;2	1;0	0.738889
		1;1	0.651082			1;1	0.800659			1;1	0.999957
		1;4	0.957684			1;4	0.17863			1;4	0.0109696
	1;4	1;0	0.118972		1;4	1;0	0.00114469		1;4	1;0	0.00142205
		1;1	0.886539			1;1	0.520912			1;1	0.0248101
		1;2	0.957684			1;2	0.17863			1;2	0.0109696
3h	1;0	1;1	0.0676755	3h	1;0	1;1	0.0858715	3h	1;0	1;1	0.747788
		1;2	0.987118			1;2	0.530977			1;2	0.0511261
		1;4	0.961934			1;4	0.869778			1;4	0.623809
	1;1	1;0	0.0676755		1;1	1;0	0.0858715		1;1	1;0	0.747788
		1;2	0.0255874			1;2	0.00313329			1;2	0.399562
		1;4	0.0182268			1;4	0.277756			1;4	0.999656
	1;2	1;0	0.987118		1;2	1;0	0.530977		1;2	1;0	0.0511261
		1;1	0.0255874			1;1	0.00313329			1;1	0.399562
		1;4	0.998497			1;4	0.148372			1;4	0.358363
	1;4	1;0	0.961934		1;4	1;0	0.869778		1;4	1;0	0.623809
		1;1	0.0182268			1;1	0.277756			1;1	0.999656
		1;2	0.998497			1;2	0.148372			1;2	0.358363
4h	1;0	1;1	0.158653	4h	1;0	1;1	0.995548	4h	1;0	1;1	0.00280589
		1;2	0.0769205			1;2	0.651762			1;2	0.000185836
		1;4	0.0373908			1;4	0.973213			1;4	0.752025
	1;1	1;0	0.158653		1;1	1;0	0.995548		1;1	1;0	0.00280589
		1;2	0.975823			1;2	0.513383			1;2	0.503377
		1;4	0.858294			1;4	0.997227			1;4	9.17576e-05
	1;2	1;0	0.0769205		1;2	1;0	0.651762		1;2	1;0	0.000185836
		1;1	0.975823			1;1	0.513383			1;1	0.503377
		1;4	0.981044			1;4	0.402605			1;4	5.63748e-06
	1;4	1;0	0.0373908		1;4	1;0	0.973213		1;4	1;0	0.752025
		1;1	0.858294			1;1	0.997227			1;1	9.17576e-05
		1;2	0.981044			1;2	0.402605			1;2	5.63748e-06
6h	1;0	1;1	0.312793	6h	1;0	1;1	0.947125	6h	1;0	1;1	0.405223
		1;2	0.0222371			1;2	0.134398			1;2	0.00437507
		1;4	0.295294			1;4	0.000432157			1;4	0.00516451
	1;1	1;0	0.312793		1;1	1;0	0.947125		1;1	1;0	0.405223
		1;2	0.000404535			1;2	0.309853			1;2	0.0917773
		1;4	0.00904558			1;4	0.00117878			1;4	0.107071
	1;2	1;0	0.0222371		1;2	1;0	0.134398		1;2	1;0	0.00437507
		1;1	0.000404535			1;1	0.309853			1;1	0.0917773
		1;4	0.532697			1;4	0.0483565			1;4	0.999743
	1;4	1;0	0.295294		1;4	1;0	0.000432157		1;4	1;0	0.00516451
		1;1	0.00904558			1;1	0.00117878			1;1	0.107071
		1;2	0.532697			1;2	0.0483565			1;2	0.999743
7h	1;0	1;1	0.901331	7h	1;0	1;1	0.131802	7h	1;0	1;1	0.0652134
		1;2	0.133674			1;2	0.895298			1;2	0.386952
		1;4	3.49137e-06			1;4	2.39861e-08			1;4	1.66361e-05
	1;1	1;0	0.901331		1;1	1;0	0.131802		1;1	1;0	0.0652134
		1;2	0.362064			1;2	0.399552			1;2	0.708761
		1;4	1.00866e-05			1;4	9.27981e-10			1;4	9.67378e-07
	1;2	1;0	0.133674		1;2	1;0	0.895298		1;2	1;0	0.386952
		1;1	0.362064			1;1	0.399552			1;1	0.708761
		1;4	0.000393354			1;4	8.4759e-09			1;4	3.55101e-06
	1;4	1;0	3.49137e-06		1;4	1;0	2.39861e-08		1;4	1;0	1.66361e-05
		1;1	1.00866e-05			1;1	9.27981e-10			1;1	9.67378e-07
		1;2	0.000393354			1;2	8.4759e-09			1;2	3.55101e-06
10h	1;0	1;1	0.972947	10h	1;0	1;1	0.96991	10h	1;0	1;1	0.372562
		1;2	0.0360876			1;2	0.393229			1;2	0.275329
		1;4	8.95717e-12			1;4	3.32998e-07			1;4	8.17577e-08
	1;1	1;0	0.972947		1;1	1;0	0.96991		1;1	1;0	0.372562
		1;2	0.0101776			1;2	0.599467			1;2	0.0184757
		1;4	3.03468e-12			1;4	6.73213e-07			1;4	4.9603e-09
	1;2	1;0	0.0360876		1;2	1;0	0.393229		1;2	1;0	0.275329
		1;1	0.0101776			1;1	0.599467			1;1	0.0184757
		1;4	1.25147e-10			1;4	0.000111118			1;4	1.58755e-05
	1;4	1;0	8.95717e-12		1;4	1;0	3.32998e-07		1;4	1;0	8.17577e-08
		1;1	3.03468e-12			1;1	6.73213e-07			1;1	4.9603e-09
		1;2	1.25147e-10			1;2	0.000111118			1;2	1.58755e-05
14h	1;0	1;1	0.000648326	14h	1;0	1;1	0.0064808	14h	1;0	1;1	0.159531
		1;2	0.991492			1;2	0.997951			1;2	0.155971
		1;4	0.954862			1;4	0.00812015			1;4	0.0659956
	1;1	1;0	0.000648326		1;1	1;0	0.0064808		1;1	1;0	0.159531
		1;2	0.000489175			1;2	0.00521745			1;2	0.00615026
		1;4	0.00109865			1;4	6.89224e-05			1;4	0.0029304
	1;2	1;0	0.991492		1;2	1;0	0.997951		1;2	1;0	0.155971
		1;1	0.000489175			1;1	0.00521745			1;1	0.00615026
		1;4	0.856668			1;4	0.0101643			1;4	0.92512
	1;4	1;0	0.954862		1;4	1;0	0.00812015		1;4	1;0	0.0659956
		1;1	0.00109865			1;1	6.89224e-05			1;1	0.0029304
		1;2	0.856668			1;2	0.0101643			1;2	0.92512

## Sheet: ANOVA for figure 7
reactivity
Supplementary Table S5. ANOVA
HSA:SA ratio
A) HSA:SA 1:0		B) HSA:SA 1:1		C) HSA:SA 1:2		D) HSA:SA 1:4
ANOVAa	Sig.	ANOVAa	Sig.	ANOVAa	Sig.	ANOVAa	Sig.
0h	0.00147292	0h	0.0559167	0h	0.00507052	0h	0.00775878
1h	0.151603	1h	0.284665	1h	0.0213671	1h	0.487307
2h	0.0814625	2h	0.0584554	2h	0.0409196	2h	0.0942335
3h	0.000852806	3h	2.63296e-08	3h	0.239616	3h	0.41959
4h	3.37797e-11	4h	5.2265e-10	4h	2.55065e-07	4h	0.00119318
6h	1.56644e-06	6h	5.14469e-05	6h	0.0202177	6h	1.32198e-05
7h	6.34664e-05	7h	3.39036e-06	7h	9.74421e-05	7h	0.0147422
10h	1.34289e-06	10h	2.26909e-07	10h	0.000659182	10h	0.00512144
14h	8.46494e-06	14h	2.50605e-05	14h	3.73673e-06	14h	0.875811
A) HSA:SA 1:0							B) HSA:SA 1:1							C) HSA:SA 1:2							D) HSA:SA 1:4
Supplementary Table S6. Post-hoc mutiple comparisons
glucose concentrations
Multiple Comparisonsa				Multiple Comparisonsa				Multiple Comparisonsa				Multiple Comparisonsa
Tukey HSD				Tukey HSD				Tukey HSD				Tukey HSD
A) HSA:SA 1:0			Sig.	B) HSA:SA 1:1			Sig.	C) HSA:SA 1:2			Sig.	D) HSA:SA 1:4			Sig.
	glucose concentrations				glucose concentrations				glucose concentrations				glucose concentrations
0h	0 mM Glc	5 mM Glc	0.552008	0h	0 mM Glc	5 mM Glc	0.635613	0h	0 mM Glc	5 mM Glc	0.998857	0h	0 mM Glc	5 mM Glc	0.994538
		10 mM Glc	0.944792			10 mM Glc	0.0711788			10 mM Glc	0.0428994			10 mM Glc	0.148243
		20 mM Glc	0.00389673			20 mM Glc	0.0939806			20 mM Glc	0.0394008			20 mM Glc	0.649722
	5 mM Glc	0 mM Glc	0.552008		5 mM Glc	0 mM Glc	0.635613		5 mM Glc	0 mM Glc	0.998857		5 mM Glc	0 mM Glc	0.994538
		10 mM Glc	0.293227			10 mM Glc	0.366262			10 mM Glc	0.031514			10 mM Glc	0.0640878
		20 mM Glc	0.0564904			20 mM Glc	0.459183			20 mM Glc	0.0288976			20 mM Glc	0.752086
	10 mM Glc	0 mM Glc	0.944792		10 mM Glc	0 mM Glc	0.0711788		10 mM Glc	0 mM Glc	0.0428994		10 mM Glc	0 mM Glc	0.148243
		5 mM Glc	0.293227			5 mM Glc	0.366262			5 mM Glc	0.031514			5 mM Glc	0.0640878
		20 mM Glc	0.00180212			20 mM Glc	0.997073			20 mM Glc	0.999968			20 mM Glc	0.00494165
	20 mM Glc	0 mM Glc	0.00389673		20 mM Glc	0 mM Glc	0.0939806		20 mM Glc	0 mM Glc	0.0394008		20 mM Glc	0 mM Glc	0.649722
		5 mM Glc	0.0564904			5 mM Glc	0.459183			5 mM Glc	0.0288976			5 mM Glc	0.752086
		10 mM Glc	0.00180212			10 mM Glc	0.997073			10 mM Glc	0.999968			10 mM Glc	0.00494165
1h	0 mM Glc	5 mM Glc	0.996944	1h	0 mM Glc	5 mM Glc	0.253587	1h	0 mM Glc	5 mM Glc	0.726408	1h	0 mM Glc	5 mM Glc	0.855407
		10 mM Glc	0.692339			10 mM Glc	0.890388			10 mM Glc	0.21261			10 mM Glc	0.997698
		20 mM Glc	0.534119			20 mM Glc	0.97566			20 mM Glc	0.0196534			20 mM Glc	0.626506
	5 mM Glc	0 mM Glc	0.996944		5 mM Glc	0 mM Glc	0.253587		5 mM Glc	0 mM Glc	0.726408		5 mM Glc	0 mM Glc	0.855407
		10 mM Glc	0.805072			10 mM Glc	0.747698			10 mM Glc	0.690112			10 mM Glc	0.767289
		20 mM Glc	0.423583			20 mM Glc	0.451807			20 mM Glc	0.0933219			20 mM Glc	0.968677
	10 mM Glc	0 mM Glc	0.692339		10 mM Glc	0 mM Glc	0.890388		10 mM Glc	0 mM Glc	0.21261		10 mM Glc	0 mM Glc	0.997698
		5 mM Glc	0.805072			5 mM Glc	0.747698			5 mM Glc	0.690112			5 mM Glc	0.767289
		20 mM Glc	0.107413			20 mM Glc	0.98543			20 mM Glc	0.517431			20 mM Glc	0.528485
	20 mM Glc	0 mM Glc	0.534119		20 mM Glc	0 mM Glc	0.97566		20 mM Glc	0 mM Glc	0.0196534		20 mM Glc	0 mM Glc	0.626506
		5 mM Glc	0.423583			5 mM Glc	0.451807			5 mM Glc	0.0933219			5 mM Glc	0.968677
		10 mM Glc	0.107413			10 mM Glc	0.98543			10 mM Glc	0.517431			10 mM Glc	0.528485
2h	0 mM Glc	5 mM Glc	0.544436	2h	0 mM Glc	5 mM Glc	0.140841	2h	0 mM Glc	5 mM Glc	0.0257005	2h	0 mM Glc	5 mM Glc	0.997378
		10 mM Glc	0.0611217			10 mM Glc	0.0495337			10 mM Glc	0.349663			10 mM Glc	0.809509
		20 mM Glc	0.266345			20 mM Glc	0.516866			20 mM Glc	0.532607			20 mM Glc	0.0978093
	5 mM Glc	0 mM Glc	0.544436		5 mM Glc	0 mM Glc	0.140841		5 mM Glc	0 mM Glc	0.0257005		5 mM Glc	0 mM Glc	0.997378
		10 mM Glc	0.416274			10 mM Glc	0.964781			10 mM Glc	0.477287			10 mM Glc	0.888132
		20 mM Glc	0.939481			20 mM Glc	0.869798			20 mM Glc	0.246784			20 mM Glc	0.135918
	10 mM Glc	0 mM Glc	0.0611217		10 mM Glc	0 mM Glc	0.0495337		10 mM Glc	0 mM Glc	0.349663		10 mM Glc	0 mM Glc	0.809509
		5 mM Glc	0.416274			5 mM Glc	0.964781			5 mM Glc	0.477287			5 mM Glc	0.888132
		20 mM Glc	0.712998			20 mM Glc	0.615934			20 mM Glc	0.975524			20 mM Glc	0.522508
	20 mM Glc	0 mM Glc	0.266345		20 mM Glc	0 mM Glc	0.516866		20 mM Glc	0 mM Glc	0.532607		20 mM Glc	0 mM Glc	0.0978093
		5 mM Glc	0.939481			5 mM Glc	0.869798			5 mM Glc	0.246784			5 mM Glc	0.135918
		10 mM Glc	0.712998			10 mM Glc	0.615934			10 mM Glc	0.975524			10 mM Glc	0.522508
3h	0 mM Glc	5 mM Glc	0.00828823	3h	0 mM Glc	5 mM Glc	1.83839e-08	3h	0 mM Glc	5 mM Glc	0.998915	3h	0 mM Glc	5 mM Glc	0.679051
		10 mM Glc	0.124183			10 mM Glc	1.88969e-06			10 mM Glc	0.306337			10 mM Glc	0.410558
		20 mM Glc	0.000634866			20 mM Glc	0.00365519			20 mM Glc	0.586979			20 mM Glc	0.541813
	5 mM Glc	0 mM Glc	0.00828823		5 mM Glc	0 mM Glc	1.83839e-08		5 mM Glc	0 mM Glc	0.998915		5 mM Glc	0 mM Glc	0.679051
		10 mM Glc	0.519267			10 mM Glc	0.0473051			10 mM Glc	0.375825			10 mM Glc	0.967347
		20 mM Glc	0.592492			20 mM Glc	0.000180159			20 mM Glc	0.673219			20 mM Glc	0.995673
	10 mM Glc	0 mM Glc	0.124183		10 mM Glc	0 mM Glc	1.88969e-06		10 mM Glc	0 mM Glc	0.306337		10 mM Glc	0 mM Glc	0.410558
		5 mM Glc	0.519267			5 mM Glc	0.0473051			5 mM Glc	0.375825			5 mM Glc	0.967347
		20 mM Glc	0.0719371			20 mM Glc	0.0410793			20 mM Glc	0.954841			20 mM Glc	0.995602
	20 mM Glc	0 mM Glc	0.000634866		20 mM Glc	0 mM Glc	0.00365519		20 mM Glc	0 mM Glc	0.586979		20 mM Glc	0 mM Glc	0.541813
		5 mM Glc	0.592492			5 mM Glc	0.000180159			5 mM Glc	0.673219			5 mM Glc	0.995673
		10 mM Glc	0.0719371			10 mM Glc	0.0410793			10 mM Glc	0.954841			10 mM Glc	0.995602
4h	0 mM Glc	5 mM Glc	9.38622e-10	4h	0 mM Glc	5 mM Glc	1.05728e-09	4h	0 mM Glc	5 mM Glc	0.0443726	4h	0 mM Glc	5 mM Glc	0.0480488
		10 mM Glc	1.48197e-10			10 mM Glc	6.8509e-08			10 mM Glc	7.83237e-05			10 mM Glc	0.00074436
		20 mM Glc	1.83518e-10			20 mM Glc	0.00697076			20 mM Glc	2.17772e-07			20 mM Glc	0.0142975
	5 mM Glc	0 mM Glc	9.38622e-10		5 mM Glc	0 mM Glc	1.05728e-09		5 mM Glc	0 mM Glc	0.0443726		5 mM Glc	0 mM Glc	0.0480488
		10 mM Glc	0.613325			10 mM Glc	0.0432723			10 mM Glc	0.0304894			10 mM Glc	0.269988
		20 mM Glc	0.105979			20 mM Glc	1.8169e-07			20 mM Glc	3.01585e-05			20 mM Glc	0.940327
	10 mM Glc	0 mM Glc	1.48197e-10		10 mM Glc	0 mM Glc	6.8509e-08		10 mM Glc	0 mM Glc	7.83237e-05		10 mM Glc	0 mM Glc	0.00074436
		5 mM Glc	0.613325			5 mM Glc	0.0432723			5 mM Glc	0.0304894			5 mM Glc	0.269988
		20 mM Glc	0.52161			20 mM Glc	4.56297e-05			20 mM Glc	0.0232034			20 mM Glc	0.569678
	20 mM Glc	0 mM Glc	1.83518e-10		20 mM Glc	0 mM Glc	0.00697076		20 mM Glc	0 mM Glc	2.17772e-07		20 mM Glc	0 mM Glc	0.0142975
		5 mM Glc	0.105979			5 mM Glc	1.8169e-07			5 mM Glc	3.01585e-05			5 mM Glc	0.940327
		10 mM Glc	0.52161			10 mM Glc	4.56297e-05			10 mM Glc	0.0232034			10 mM Glc	0.569678
6h	0 mM Glc	5 mM Glc	0.000463578	6h	0 mM Glc	5 mM Glc	0.000147563	6h	0 mM Glc	5 mM Glc	0.999902	6h	0 mM Glc	5 mM Glc	1.06766e-05
		10 mM Glc	8.46063e-07			10 mM Glc	0.00014618			10 mM Glc	0.0334105			10 mM Glc	0.000695517
		20 mM Glc	0.000201601			20 mM Glc	0.0840805			20 mM Glc	0.998977			20 mM Glc	0.000138814
	5 mM Glc	0 mM Glc	0.000463578		5 mM Glc	0 mM Glc	0.000147563		5 mM Glc	0 mM Glc	0.999902		5 mM Glc	0 mM Glc	1.06766e-05
		10 mM Glc	0.021241			10 mM Glc	1			10 mM Glc	0.037913			10 mM Glc	0.451394
		20 mM Glc	0.791723			20 mM Glc	0.0646504			20 mM Glc	0.999835			20 mM Glc	0.508013
	10 mM Glc	0 mM Glc	8.46063e-07		10 mM Glc	0 mM Glc	0.00014618		10 mM Glc	0 mM Glc	0.0334105		10 mM Glc	0 mM Glc	0.000695517
		5 mM Glc	0.021241			5 mM Glc	1			5 mM Glc	0.037913			5 mM Glc	0.451394
		20 mM Glc	0.232767			20 mM Glc	0.0641225			20 mM Glc	0.0439926			20 mM Glc	0.994374
	20 mM Glc	0 mM Glc	0.000201601		20 mM Glc	0 mM Glc	0.0840805		20 mM Glc	0 mM Glc	0.998977		20 mM Glc	0 mM Glc	0.000138814
		5 mM Glc	0.791723			5 mM Glc	0.0646504			5 mM Glc	0.999835			5 mM Glc	0.508013
		10 mM Glc	0.232767			10 mM Glc	0.0641225			10 mM Glc	0.0439926			10 mM Glc	0.994374
7h	0 mM Glc	5 mM Glc	3.66839e-05	7h	0 mM Glc	5 mM Glc	4.30936e-05	7h	0 mM Glc	5 mM Glc	0.00166478	7h	0 mM Glc	5 mM Glc	0.994455
		10 mM Glc	0.00286417			10 mM Glc	5.67571e-06			10 mM Glc	0.000111301			10 mM Glc	0.0777721
		20 mM Glc	0.0821787			20 mM Glc	3.41134e-05			20 mM Glc	0.000321985			20 mM Glc	0.0510986
	5 mM Glc	0 mM Glc	3.66839e-05		5 mM Glc	0 mM Glc	4.30936e-05		5 mM Glc	0 mM Glc	0.00166478		5 mM Glc	0 mM Glc	0.994455
		10 mM Glc	0.106628			10 mM Glc	0.814831			10 mM Glc	0.703789			10 mM Glc	0.0928773
		20 mM Glc	0.00699705			20 mM Glc	0.958234			20 mM Glc	0.798404			20 mM Glc	0.0602529
	10 mM Glc	0 mM Glc	0.00286417		10 mM Glc	0 mM Glc	5.67571e-06		10 mM Glc	0 mM Glc	0.000111301		10 mM Glc	0 mM Glc	0.0777721
		5 mM Glc	0.106628			5 mM Glc	0.814831			5 mM Glc	0.703789			5 mM Glc	0.0928773
		20 mM Glc	0.440816			20 mM Glc	0.989481			20 mM Glc	0.999767			20 mM Glc	0.979189
	20 mM Glc	0 mM Glc	0.0821787		20 mM Glc	0 mM Glc	3.41134e-05		20 mM Glc	0 mM Glc	0.000321985		20 mM Glc	0 mM Glc	0.0510986
		5 mM Glc	0.00699705			5 mM Glc	0.958234			5 mM Glc	0.798404			5 mM Glc	0.0602529
		10 mM Glc	0.440816			10 mM Glc	0.989481			10 mM Glc	0.999767			10 mM Glc	0.979189
10h	0 mM Glc	5 mM Glc	4.58821e-06	10h	0 mM Glc	5 mM Glc	1.07776e-06	10h	0 mM Glc	5 mM Glc	0.000574141	10h	0 mM Glc	5 mM Glc	0.00315753
		10 mM Glc	7.9114e-06			10 mM Glc	1.43313e-05			10 mM Glc	0.0117137			10 mM Glc	0.249182
		20 mM Glc	4.16483e-05			20 mM Glc	7.6584e-07			20 mM Glc	0.0204239			20 mM Glc	0.612108
	5 mM Glc	0 mM Glc	4.58821e-06		5 mM Glc	0 mM Glc	1.07776e-06		5 mM Glc	0 mM Glc	0.000574141		5 mM Glc	0 mM Glc	0.00315753
		10 mM Glc	0.924986			10 mM Glc	0.592147			10 mM Glc	0.914258			10 mM Glc	0.17669
		20 mM Glc	0.698226			20 mM Glc	0.998008			20 mM Glc	0.783277			20 mM Glc	0.0475479
	10 mM Glc	0 mM Glc	7.9114e-06		10 mM Glc	0 mM Glc	1.43313e-05		10 mM Glc	0 mM Glc	0.0117137		10 mM Glc	0 mM Glc	0.249182
		5 mM Glc	0.924986			5 mM Glc	0.592147			5 mM Glc	0.914258			5 mM Glc	0.17669
		20 mM Glc	0.952324			20 mM Glc	0.487625			20 mM Glc	0.993989			20 mM Glc	0.899759
	20 mM Glc	0 mM Glc	4.16483e-05		20 mM Glc	0 mM Glc	7.6584e-07		20 mM Glc	0 mM Glc	0.0204239		20 mM Glc	0 mM Glc	0.612108
		5 mM Glc	0.698226			5 mM Glc	0.998008			5 mM Glc	0.783277			5 mM Glc	0.0475479
		10 mM Glc	0.952324			10 mM Glc	0.487625			10 mM Glc	0.993989			10 mM Glc	0.899759
14h	0 mM Glc	5 mM Glc	0.000857593	14h	0 mM Glc	5 mM Glc	3.66527e-05	14h	0 mM Glc	5 mM Glc	7.64113e-05	14h	0 mM Glc	5 mM Glc	0.949384
		10 mM Glc	1.3099e-05			10 mM Glc	4.46008e-05			10 mM Glc	3.24126e-06			10 mM Glc	0.859141
		20 mM Glc	1.56499e-05			20 mM Glc	0.000532868			20 mM Glc	1.63761e-05			20 mM Glc	0.991422
	5 mM Glc	0 mM Glc	0.000857593		5 mM Glc	0 mM Glc	3.66527e-05		5 mM Glc	0 mM Glc	7.64113e-05		5 mM Glc	0 mM Glc	0.949384
		10 mM Glc	0.00412555			10 mM Glc	0.993069			10 mM Glc	0.00614367			10 mM Glc	0.993681
		20 mM Glc	0.00574004			20 mM Glc	0.0545942			20 mM Glc	0.230192			20 mM Glc	0.994338
	10 mM Glc	0 mM Glc	1.3099e-05		10 mM Glc	0 mM Glc	4.46008e-05		10 mM Glc	0 mM Glc	3.24126e-06		10 mM Glc	0 mM Glc	0.859141
		5 mM Glc	0.00412555			5 mM Glc	0.993069			5 mM Glc	0.00614367			5 mM Glc	0.993681
		20 mM Glc	0.99259			20 mM Glc	0.0792245			20 mM Glc	0.106735			20 mM Glc	0.956415
	20 mM Glc	0 mM Glc	1.56499e-05		20 mM Glc	0 mM Glc	0.000532868		20 mM Glc	0 mM Glc	1.63761e-05		20 mM Glc	0 mM Glc	0.991422
		5 mM Glc	0.00574004			5 mM Glc	0.0545942			5 mM Glc	0.230192			5 mM Glc	0.994338
		10 mM Glc	0.99259			10 mM Glc	0.0792245			10 mM Glc	0.106735			10 mM Glc	0.956415

## Sheet: ANOVA for figure 8
reactivity
Supplementary Table S7. ANOVA
Glucose concentration
A) 5mM glucose		B) 10mM glucose		C) 20mM glucose
ANOVAa	Sig.	ANOVAa	Sig.	ANOVAa	Sig.
0h	0.54065	0h	0.850721	0h	0.137227
1h	0.0178595	1h	0.00036213	1h	0.00589173
2h	0.00136369	2h	0.00457459	2h	0.0585117
3h	0.00133417	3h	0.000857238	3h	0.782962
4h	1.44346e-06	4h	1.09347e-05	4h	7.62101e-05
6h	0.00306807	6h	1.38246e-06	6h	0.00245544
7h	1.44281e-09	7h	0.000128073	7h	3.38773e-08
10h	7.10261e-10	10h	1.96255e-07	10h	1.96994e-06
14h	0.0975599	14h	0.000738641	14h	4.76699e-06
A) 5mM glucose							B) 10mM glucose							C) 20mM glucose
Supplementary Table S8. Post-hoc mutiple comparisons
molar ratios of HSA:SA
Multiple Comparisonsa				Multiple Comparisonsa				Multiple Comparisonsa
Games-Howell				Games-Howell				Games-Howell
A) 5mM glucose			Sig.	B) 10mM glucose			Sig.	C) 20mM glucose			Sig.
	molar ratios of HSA:SA				molar ratios of HSA:SA				molar ratios of HSA:SA
0h	1;0	1;1	0.905723	0h	1;0	1;1	0.882141	0h	1;0	1;1	0.744923
		1;2	0.59908			1;2	0.932248			1;2	0.806124
		1;4	0.960098			1;4	0.997991			1;4	0.822066
	1;1	1;0	0.905723		1;1	1;0	0.882141		1;1	1;0	0.744923
		1;2	0.587478			1;2	0.999974			1;2	0.118865
		1;4	0.997299			1;4	0.908017			1;4	0.0679677
	1;2	1;0	0.59908		1;2	1;0	0.932248		1;2	1;0	0.806124
		1;1	0.587478			1;1	0.999974			1;1	0.118865
		1;4	0.64119			1;4	0.959205			1;4	0.999305
	1;4	1;0	0.960098		1;4	1;0	0.997991		1;4	1;0	0.822066
		1;1	0.997299			1;1	0.908017			1;1	0.0679677
		1;2	0.64119			1;2	0.959205			1;2	0.999305
1h	1;0	1;1	0.838547	1h	1;0	1;1	0.0491036	1h	1;0	1;1	0.22534
		1;2	0.125086			1;2	0.0249691			1;2	0.301232
		1;4	0.619163			1;4	0.787472			1;4	0.0436652
	1;1	1;0	0.838547		1;1	1;0	0.0491036		1;1	1;0	0.22534
		1;2	0.58859			1;2	0.713296			1;2	0.999996
		1;4	0.544103			1;4	0.0222095			1;4	0.0327013
	1;2	1;0	0.125086		1;2	1;0	0.0249691		1;2	1;0	0.301232
		1;1	0.58859			1;1	0.713296			1;1	0.999996
		1;4	0.058644			1;4	0.0139205			1;4	0.0543286
	1;4	1;0	0.619163		1;4	1;0	0.787472		1;4	1;0	0.0436652
		1;1	0.544103			1;1	0.0222095			1;1	0.0327013
		1;2	0.058644			1;2	0.0139205			1;2	0.0543286
2h	1;0	1;1	0.578292	2h	1;0	1;1	0.00941301	2h	1;0	1;1	0.219657
		1;2	0.00820277			1;2	0.174365			1;2	0.867529
		1;4	0.0203732			1;4	0.231635			1;4	0.490757
	1;1	1;0	0.578292		1;1	1;0	0.00941301		1;1	1;0	0.219657
		1;2	0.114249			1;2	0.190534			1;2	0.00662419
		1;4	0.260605			1;4	0.273524			1;4	0.985881
	1;2	1;0	0.00820277		1;2	1;0	0.174365		1;2	1;0	0.867529
		1;1	0.114249			1;1	0.190534			1;1	0.00662419
		1;4	0.923452			1;4	0.999999			1;4	0.262892
	1;4	1;0	0.0203732		1;4	1;0	0.231635		1;4	1;0	0.490757
		1;1	0.260605			1;1	0.273524			1;1	0.985881
		1;2	0.923452			1;2	0.999999			1;2	0.262892
3h	1;0	1;1	0.738442	3h	1;0	1;1	0.00480172	3h	1;0	1;1	0.86167
		1;2	0.0100892			1;2	0.0186252			1;2	0.894578
		1;4	0.16765			1;4	0.53868			1;4	0.807768
	1;1	1;0	0.738442		1;1	1;0	0.00480172		1;1	1;0	0.86167
		1;2	0.00637396			1;2	0.995185			1;2	0.999899
		1;4	0.31393			1;4	0.0658705			1;4	0.998042
	1;2	1;0	0.0100892		1;2	1;0	0.0186252		1;2	1;0	0.894578
		1;1	0.00637396			1;1	0.995185			1;1	0.999899
		1;4	0.248033			1;4	0.142172			1;4	0.995589
	1;4	1;0	0.16765		1;4	1;0	0.53868		1;4	1;0	0.807768
		1;1	0.31393			1;1	0.0658705			1;1	0.998042
		1;2	0.248033			1;2	0.142172			1;2	0.995589
4h	1;0	1;1	0.00662333	4h	1;0	1;1	0.00150387	4h	1;0	1;1	0.0257624
		1;2	0.000181504			1;2	0.000286522			1;2	0.000420866
		1;4	0.00158957			1;4	0.0317032			1;4	0.0928413
	1;1	1;0	0.00662333		1;1	1;0	0.00150387		1;1	1;0	0.0257624
		1;2	0.0198296			1;2	0.300571			1;2	0.314611
		1;4	0.354661			1;4	0.559926			1;4	0.910964
	1;2	1;0	0.000181504		1;2	1;0	0.000286522		1;2	1;0	0.000420866
		1;1	0.0198296			1;1	0.300571			1;1	0.314611
		1;4	0.323449			1;4	0.107386			1;4	0.775691
	1;4	1;0	0.00158957		1;4	1;0	0.0317032		1;4	1;0	0.0928413
		1;1	0.354661			1;1	0.559926			1;1	0.910964
		1;2	0.323449			1;2	0.107386			1;2	0.775691
6h	1;0	1;1	0.938839	6h	1;0	1;1	6.91961e-06	6h	1;0	1;1	0.305575
		1;2	0.0280448			1;2	0.484333			1;2	0.996431
		1;4	0.00458516			1;4	0.00425024			1;4	0.015611
	1;1	1;0	0.938839		1;1	1;0	6.91961e-06		1;1	1;0	0.305575
		1;2	0.33365			1;2	8.12759e-05			1;2	0.101451
		1;4	0.0507317			1;4	0.999394			1;4	0.194866
	1;2	1;0	0.0280448		1;2	1;0	0.484333		1;2	1;0	0.996431
		1;1	0.33365			1;1	8.12759e-05			1;1	0.101451
		1;4	0.239228			1;4	0.00847481			1;4	0.00671486
	1;4	1;0	0.00458516		1;4	1;0	0.00425024		1;4	1;0	0.015611
		1;1	0.0507317			1;1	0.999394			1;1	0.194866
		1;2	0.239228			1;2	0.00847481			1;2	0.00671486
7h	1;0	1;1	0.977019	7h	1;0	1;1	0.240722	7h	1;0	1;1	0.000558227
		1;2	0.00243635			1;2	0.688532			1;2	0.00580083
		1;4	4.41072e-05			1;4	0.000787589			1;4	0.000194723
	1;1	1;0	0.977019		1;1	1;0	0.240722		1;1	1;0	0.000558227
		1;2	0.000649939			1;2	0.493345			1;2	0.104091
		1;4	8.85092e-07			1;4	0.139297			1;4	0.00245522
	1;2	1;0	0.00243635		1;2	1;0	0.688532		1;2	1;0	0.00580083
		1;1	0.000649939			1;1	0.493345			1;1	0.104091
		1;4	0.00537494			1;4	0.000144297			1;4	0.036189
	1;4	1;0	4.41072e-05		1;4	1;0	0.000787589		1;4	1;0	0.000194723
		1;1	8.85092e-07			1;1	0.139297			1;1	0.00245522
		1;2	0.00537494			1;2	0.000144297			1;2	0.036189
10h	1;0	1;1	0.033553	10h	1;0	1;1	0.0157465	10h	1;0	1;1	0.00209002
		1;2	0.00127084			1;2	0.00176889			1;2	0.000323493
		1;4	2.55368e-06			1;4	7.39996e-06			1;4	8.79868e-05
	1;1	1;0	0.033553		1;1	1;0	0.0157465		1;1	1;0	0.00209002
		1;2	0.0440712			1;2	0.240952			1;2	0.950914
		1;4	2.5441e-05			1;4	0.000815295			1;4	0.235654
	1;2	1;0	0.00127084		1;2	1;0	0.00176889		1;2	1;0	0.000323493
		1;1	0.0440712			1;1	0.240952			1;1	0.950914
		1;4	0.0010863			1;4	0.057409			1;4	0.376391
	1;4	1;0	2.55368e-06		1;4	1;0	7.39996e-06		1;4	1;0	8.79868e-05
		1;1	2.5441e-05			1;1	0.000815295			1;1	0.235654
		1;2	0.0010863			1;2	0.057409			1;2	0.376391
14h	1;0	1;1	6.90377e-05	14h	1;0	1;1	0.792554	14h	1;0	1;1	0.00125212
		1;2	0.170479			1;2	0.966827			1;2	0.000456728
		1;4	0.686077			1;4	0.107787			1;4	0.00103089
	1;1	1;0	6.90377e-05		1;1	1;0	0.792554		1;1	1;0	0.00125212
		1;2	0.371353			1;2	0.00086922			1;2	0.207836
		1;4	0.230276			1;4	0.000418221			1;4	0.657381
	1;2	1;0	0.170479		1;2	1;0	0.966827		1;2	1;0	0.000456728
		1;1	0.371353			1;1	0.00086922			1;1	0.207836
		1;4	0.38906			1;4	0.00163127			1;4	0.999403
	1;4	1;0	0.686077		1;4	1;0	0.107787		1;4	1;0	0.00103089
		1;1	0.230276			1;1	0.000418221			1;1	0.657381
		1;2	0.38906			1;2	0.00163127			1;2	0.999403
